# Supplementary material
Source: PubMed Central journal article supplement (PMC3879709)
Supplement: cr2013167x1.pdf [file cr2013167x1.pdf]

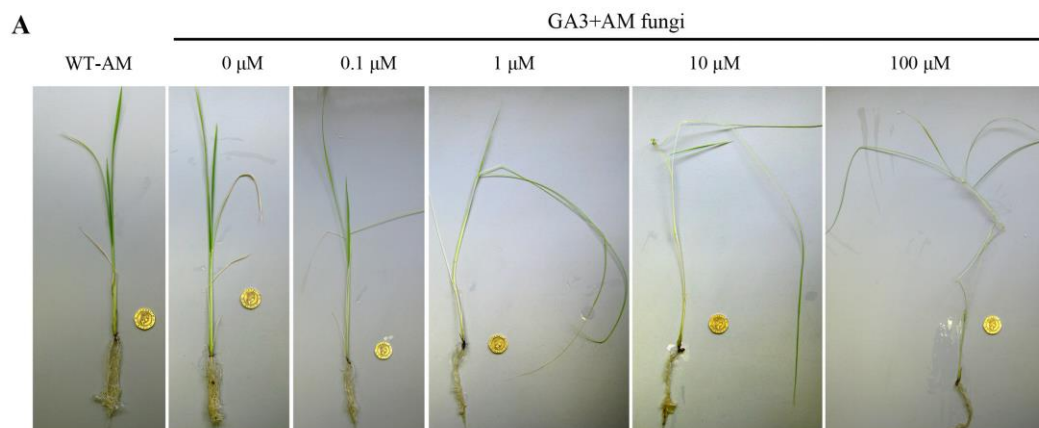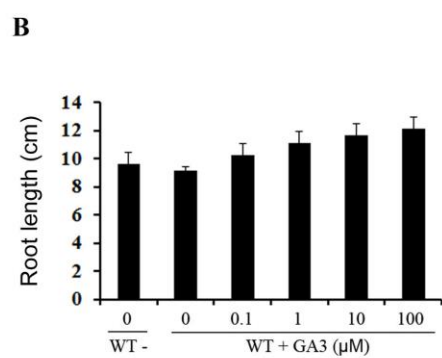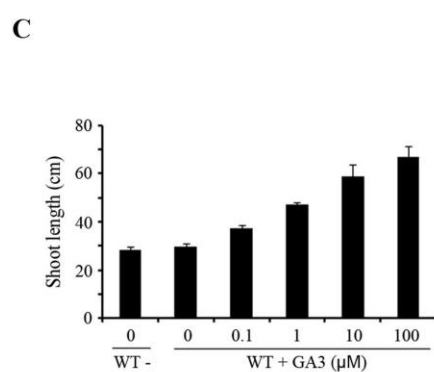

**Supplementary information, Figure S1** GA3 promotes rice plant growth.

(A) GA3 promotes rice shoot elongation at 6 weeks. (B) Rice root length under GA3 treatment at 6 weeks. (C) Shoot length under GA3 treatment at 6 weeks.
