# Supplementary material
Source: PubMed Central journal article supplement (PMC3879709)
Supplement: cr2013167x2.pdf [file cr2013167x2.pdf]

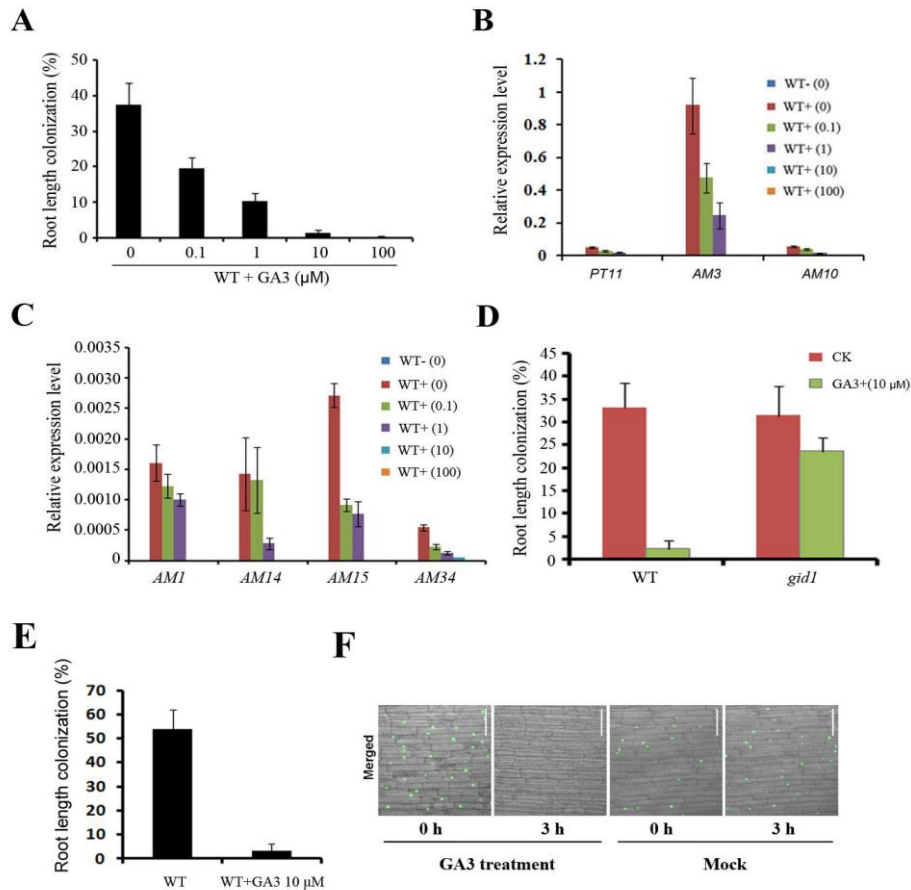

**Supplementary information, Figure S2** Gibberellic acid inhibits mycorrhizal colonization.

(A) Quantification of *R. irregularis* colonization 6 weeks post inoculation. This is a representative experiment that was repeated three times. (B, C) qRT-PCR analysis in rice roots upon 6 weeks post inoculation with *R. irregularis* and treated with the given concentrations of GA3 ( $\mu\text{M}$ ). "-"/"+" means without/with given concentration of GA3 treatment. Expression levels are shown relative to the constitutively expressed *CYCLOPHILIN2* gene. Error bars indicate standard error of three quantitative PCR repeats and the results were consistent in three replications. (D) Quantification of *R. irregularis* colonization 6 weeks post inoculation in wild-type and *gid1* mutants. The inoculated plants were treated with 10  $\mu\text{M}$  GA3. This is a representative experiment that was repeated twice ( $n = 24$  plants). Bars represent standard error. (E) Quantification of mycorrhizal colonization in *M. truncatula* 6 weeks post inoculation with *R. irregularis*. Plants were treated with 10  $\mu\text{M}$  GA3. This data is from a representative experiment that was repeated three times ( $n = 12$  plants). (F) Rice lines stably transformed with SLR1-YFP were treated with 10  $\mu\text{M}$  GA3 for 3 hours. GA treatment caused degradation of SLR1 in the nucleus. 10-day-old plants with and without GA3 were observed under a confocal microscope.
