# Supplementary material
Source: PubMed Central journal article supplement (PMC3879709)
Supplement: cr2013167x3.pdf [file cr2013167x3.pdf]

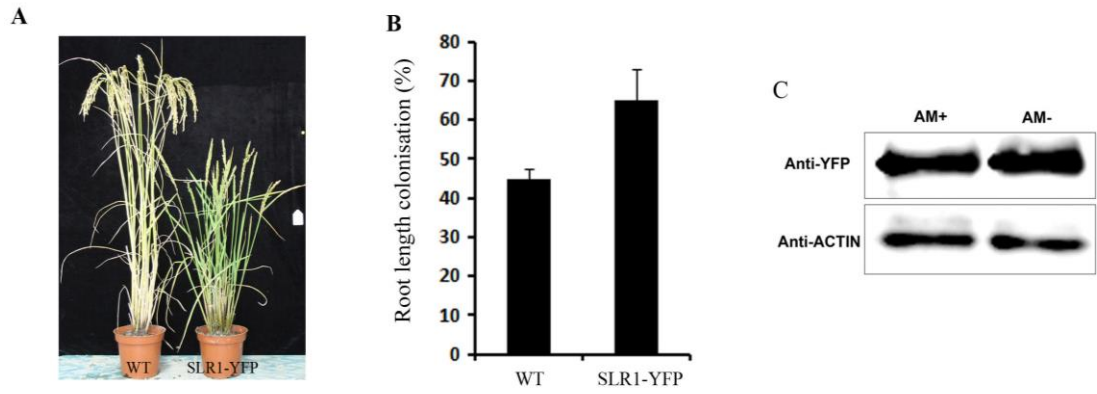

**Supplementary information, Figure S3** SLR1-YFP fusion protein functions in mycorrhizal colonization and plant development.

(A) Overexpression of *SLR1-YFP* limited plant growth in rice. (B) Increase of AM colonisation level in a line overexpressing *SLR1-YFP*. (C) Protein levels of SLR1-YFP were confirmed by western blot in the overexpression line. ACTIN used as loading control.
