# Supplementary material
Source: PubMed Central journal article supplement (PMC3879709)
Supplement: cr2013167x4.pdf [file cr2013167x4.pdf]

**Supplementary information, Figure S4** Expression of AM specific marker genes in *slr1* mutant and expression pattern of *SLRI* during mycorrhizal colonisation.

(A, B) Expression analysis (qRT-PCR) of marker genes in wild-type and *slr1* mutant roots 6 weeks post inoculation with *R. irregularis*. Expression of *CYCLOPHILIN2* was used for normalization. Error bars indicate standard error of three quantitative PCR repeats and the results were consistent in three replications. (C) A time course showing the relative expression of *SLRI* upon *R. irregularis* inoculation. Error bars indicate standard error of three quantitative PCR repeats and the results were consistent in three replications.
