# Supplementary material
Source: PubMed Central journal article supplement (PMC3879709)
Supplement: cr2013167x5.pdf [file cr2013167x5.pdf]

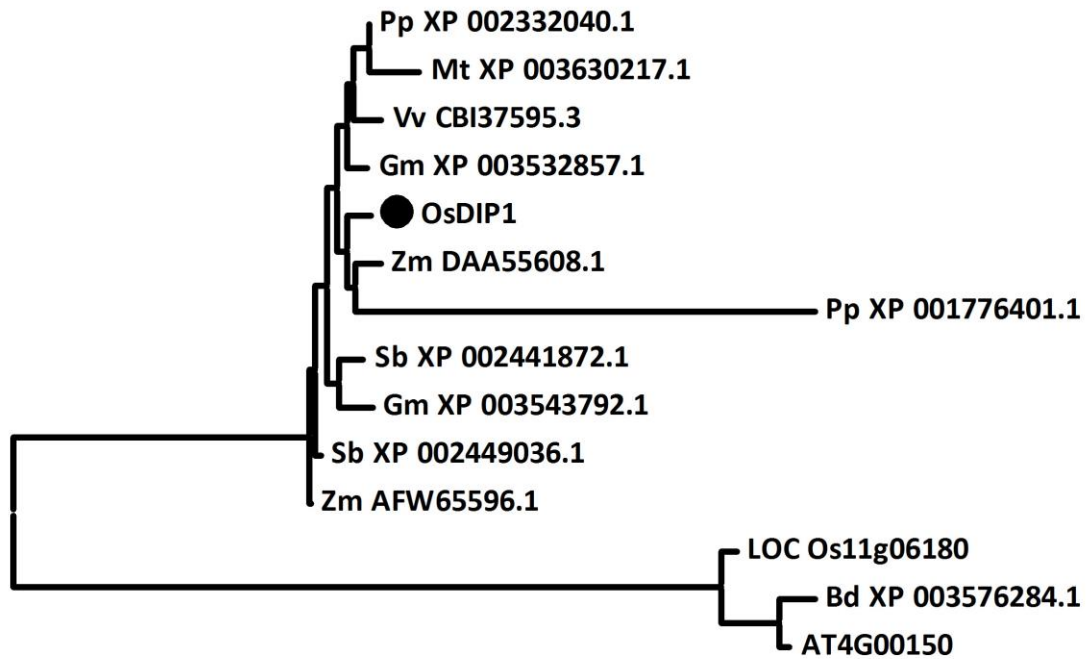

**Supplementary information, Figure S5** Phylogenetic tree revealed DIP1 is conserved in mycorrhizal colonised plants.

A phylogenetic tree of DIP1 and homologs from *Arabidopsis* (AT) and *M. truncatula* (Mt), as well as DIP1 homologs from poplar (Pt), vine (Vv), *Glycine max* (Gm), *Zea mays* (Zm), *Brachypodium distachyon* (Bd), *Selaginella moellendorffii* (Sm), *Physcomitrella patens* (Pp) and rice (Os). Branch support was obtained from 1000 bootstrap repetitions. *DIP1* appears to define a unique group within plant species that enter the arbuscular mycorrhizal association, but that is absent from *Arabidopsis*.
