# Supplementary material
Source: PubMed Central journal article supplement (PMC3879709)
Supplement: cr2013167x6.pdf [file cr2013167x6.pdf]

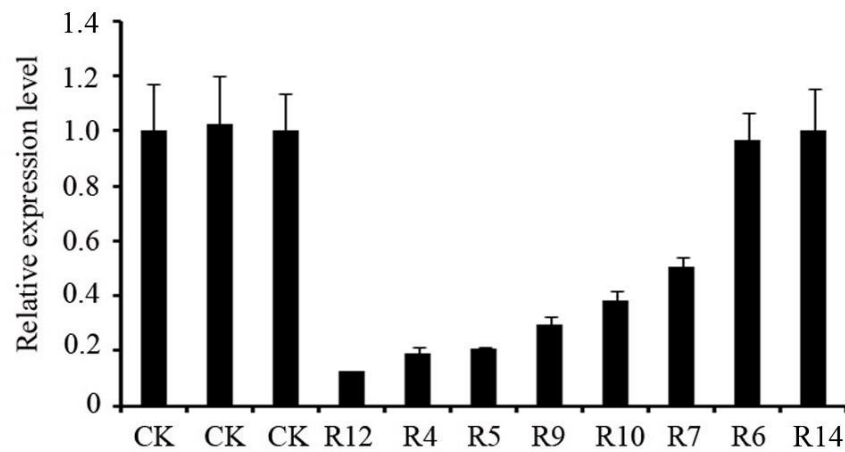

**Supplementary information, Figure S6** Expression of *DIP1* in *DIP1* RNAi lines.

qRT-PCR revealed the expression of *DIP1* in the different *DIP1* rice RNAi lines. Expression levels are shown relative to the constitutively expressed *CYCLOPHILIN2* gene. CK represents empty vector. Error bars indicate standard error of three quantitative PCR repeats. Note that AM colonisation levels correlate well with the levels of *DIP1*.
