# Supplementary material
Source: PubMed Central journal article supplement (PMC3879709)
Supplement: cr2013167x7.pdf [file cr2013167x7.pdf]

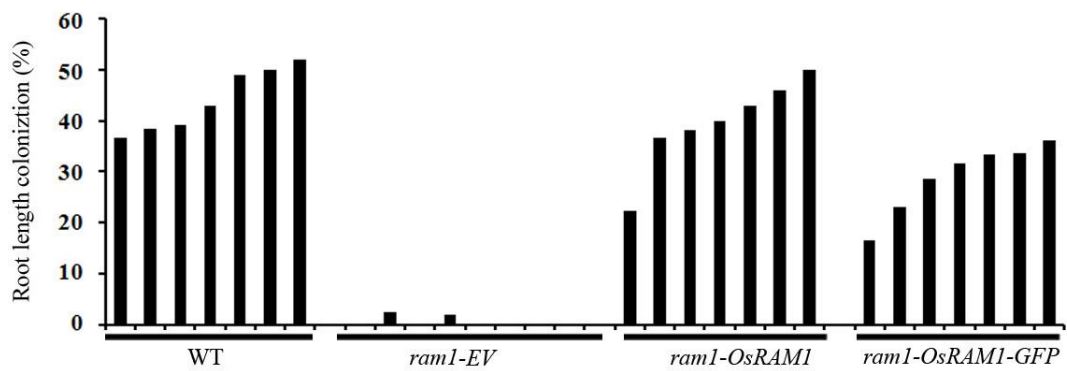

**Supplementary information, Figure S7** *OsRAMI* serves the same function as *MtRAMI* in *Medicago*.

Quantification of *R. irregularis* colonisation in wild-type (WT) and *ram1* roots transformed either with the empty vector (EV) or with *OsRAMI* and *OsRAMI-GFP*. The experiment was repeated two times and representative data is shown.
